# Supplementary material for: Operational response simulation tool for epidemics within refugee and IDP settlements: A scenario-based case study of the Cox’s Bazar settlement
Source: PubMed Central journal article supplement (PMC8553081; doi:10.1371/journal.pcbi.1009360), 2021-10-28
Supplement: pcbi.1009360.s004.pdf [file pcbi.1009360.s004.pdf]

## S4 Tables

### Intervention details

| Parameter                                                                                  | Values            |
|--------------------------------------------------------------------------------------------|-------------------|
| Symptomatic quarantine compliance                                                          | Fixed: 30%        |
| Household quarantine compliance                                                            | Fixed: 20%        |
| Testing compliance                                                                         | Varied: 50%-100%  |
| Average time delay between symptom onset and going to a treatment center                   | Varied: 5-10 days |
| Standard deviation of the time delay between symptom onset and going to a treatment center | Fixed: 1 day      |
| Time spent in isolation inside a treatment center if tested positive                       | Varied: 5-10 days |

**Table 1. Isolation Center Simulation Parameters**

The time delay between the onset of symptoms and going to a treatment center is drawn from a Normal distribution. In reality, tests used in the Cox's Bazar settlement take approximately 2 days to be processed and therefore choosing a mean time delay to isolation of 2 days presents a reasonable scenario. Including time delays as low as 0 days with high compliance rates presents a best-case scenario in which tests can be rapidly processed.

| Intervention | Details<br>[Compliance (%),<br>Isolation time<br>(days), Time delay<br>to isolation (days)] | Cumulative<br>Infections | Peak<br>Intensity | Peak<br>Timing |
|--------------|---------------------------------------------------------------------------------------------|--------------------------|-------------------|----------------|
| Baseline     | No isolation                                                                                | 433298                   | 7769              | Day 100        |
| 1            | [100, 10, 0]                                                                                | 434435                   | 7911              | Day 103        |
| 2            | [100, 10, 1]                                                                                | 434194                   | 7707              | Day 99         |
| 3            | [100, 10, 2]                                                                                | 431868                   | 7727              | Day 102        |
| 4            | [100, 10, 3]                                                                                | 431854                   | 7712              | Day 104        |
| 5            | [100, 10, 5]                                                                                | 433298                   | 7858              | Day 105        |
| 6            | [100, 5, 2]                                                                                 | 432042                   | 7709              | Day 96         |

**Table 2. Isolation Centers:** a summary of the isolation centers vs. home-care scenario simulations. Numbers are presented as 7-day rolling averages. Across all interventions, there is minimal change in the cumulative number of infections, peak intensity and peak timing. Note, that these data are for one simulation run only, however, the stochastic behaviour of the model is minimal.

| Parameter                         | Value                                                                          |
|-----------------------------------|--------------------------------------------------------------------------------|
| Mask wearing compliance           | Rate of people wearing masks correctly                                         |
| Mask wearing efficacy             | Estimated rate based on mask filtration ability, mask fit, and mask reuse [1]. |
| Mask filtration ability           | Depends on no. of layers/type of fabric                                        |
| Mask wearing compliance rate      | Varied: 10%-100%                                                               |
| Mask wearing efficacy rate        | Varied: 10%-90%                                                                |
| Single layer cotton mask efficacy | Estimate: 50% [2-4]                                                            |
| Surgical mask efficacy            | Estimate: 80% [2-4]                                                            |

**Table 3. Mask Wearing Simulation Parameters**

The effect of mask wearing in different locations depends on mask efficacy and mask wearing compliance. For simplicity, the total compliance was varied equally across all locations. Note that literature on the efficacy of mask wearing is in preliminary stages and/or has small sample sizes, making it difficult to draw precise conclusions from the results.

| Intervention | Details [Mask Efficacy (%), Mask Compliance (%)] | Cumulative Infections | Peak Intensity | Peak Timing |
|--------------|--------------------------------------------------|-----------------------|----------------|-------------|
| Baseline     | No masks                                         | 434249                | 7925           | Day 95      |
| 1            | [20, 25]                                         | 422831                | 7327           | Day 102     |
| 2            | [20, 50]                                         | 406014                | 6292           | Day 110     |
| 3            | [20, 100]                                        | 367584                | 4739           | Day 121     |
| 4            | [50, 25]                                         | 400031                | 5961           | Day 103     |
| 5            | [50, 50]                                         | 340421                | 4233           | Day 127     |
| 6            | [50, 100]                                        | 61038                 | 766            | Day 199     |
| 7            | [80, 25]                                         | 366205                | 4951           | Day 119     |
| 8            | [80, 50]                                         | 166827                | 2133           | Day 193     |
| 9            | [80, 100]                                        | 4281                  | 69*            | Day 9*      |

**Table 4. Mask Wearing:** a summary of the mask wearing simulations. Numbers are presented as 7-day rolling averages. Low cumulative infections, peak intensity and delayed peaks are observed for higher efficacy masks and compliance rates. For interventions marked with an \*, these figures may be misleading as the statistics are so low for these runs that they can be considered random fluctuations. Note, that these data are for one simulation run only, however, the stochastic behaviour of the model is minimal.

| Parameter                                     | Definition/Value        |
|-----------------------------------------------|-------------------------|
| Indoor setting/shelter interaction intensity  | Varied: [45%, 55%, 65%] |
| Outdoor setting/shelter interaction intensity | Varied: [5%, 10%, 15%]  |

**Table 5. Learning Center Reopening Simulation Parameters**

Under the assumption of no mitigation strategies, opening learning centers depends on the choice of interaction intensity parameters. We vary each of the indoor and outdoor interaction intensities while keeping the other fixed.

| Intervention | Details<br>[Learning Center<br>Status, Household<br>Intensity (%),<br>Outdoor Intensity<br>(%), Indoor Intensity<br>(%)] | Cumulative<br>Infections | Peak<br>Intensity | Peak<br>Timing |
|--------------|--------------------------------------------------------------------------------------------------------------------------|--------------------------|-------------------|----------------|
| 1            | [Open, 25%, 5%, 45%]                                                                                                     | 505749                   | 14887             | Day 65         |
| 2            | [Open, 25%, 5%, 55%]                                                                                                     | 522908                   | 18254             | Day 57         |
| 3            | [Open, 25%, 5%, 65%]                                                                                                     | 533816                   | 20659             | Day 54         |
| 4            | [Closed, 25%, 5%, 45%]                                                                                                   | 395970                   | 5929              | Day 110        |
| 5            | [Closed, 25%, 5%, 55%]                                                                                                   | 434594                   | 8003              | Day 89         |
| 6            | [Closed, 25%, 5%, 65%]                                                                                                   | 461328                   | 9568              | Day 86         |
| 7            | [Open, 25%, 15%, 55%]                                                                                                    | 554736                   | 26376             | Day 45         |
| 8            | [Open, 25%, 10%, 55%]                                                                                                    | 544871                   | 23117             | Day 50         |
| 9            | [Closed, 25%, 15%, 55%]                                                                                                  | 542801                   | 19054             | Day 59         |
| 10           | [Closed, 25%, 10%, 55%]                                                                                                  | 514001                   | 14287             | Day 69         |

**Table 6. Learning Center:** a summary of the re-opening learning centers simulations. Numbers are presented as 7-day rolling averages. Since we vary both the indoor and outdoor intensities with learning centers open and closed we do not have a baseline run. We can see that in all comparable scenarios, opening the learning centers can increase the risk of infection. Note, that these data are for one simulation run only, however, the stochastic behaviour of the model is minimal.

| Intervention                                                           | Values<br>(Interaction intensities are relative to the baseline indoor interaction intensity which is set at 55% of the shelter interaction intensity) | Details                                                                                                                                                                                                                                                                                                         | Sources |
|------------------------------------------------------------------------|--------------------------------------------------------------------------------------------------------------------------------------------------------|-----------------------------------------------------------------------------------------------------------------------------------------------------------------------------------------------------------------------------------------------------------------------------------------------------------------|---------|
| Learning center attendance                                             | Varied: [Daily, Every other day]                                                                                                                       | <ul style="list-style-type: none"> <li>• Attendance every other day results in classes of half the size</li> </ul>                                                                                                                                                                                              |         |
| Extra learning centers                                                 | Varied: [10,50,100]                                                                                                                                    | <ul style="list-style-type: none"> <li>• Children from schools with the largest class sizes are sent to an extra learning center</li> </ul>                                                                                                                                                                     |         |
| Learning center interaction intensity                                  | Varied: [20%, 35%, 55%, 70%, 90% ]                                                                                                                     | <ul style="list-style-type: none"> <li>• Varied intensities can correspond to the interventions listed below</li> </ul>                                                                                                                                                                                         |         |
| Physical distancing interaction intensity                              | Estimated: 30%-50%                                                                                                                                     | <ul style="list-style-type: none"> <li>• Effectively means halving the class size</li> <li>• Assumed less effective in practice (i.e. compared to mask wearing) as it is harder to strictly enforce in smaller rooms with a teacher moving around</li> </ul>                                                    | [5-7]   |
| Mask wearing interaction intensity                                     | Estimated: 30%-50%                                                                                                                                     | <ul style="list-style-type: none"> <li>• Given constant supervision by teachers, can assume high likelihood of proper/constant wear by students</li> <li>• Teachers would wear a mask unless they are speaking from the front of the classroom/cannot be understood by students while wearing a mask</li> </ul> | [3-8]   |
| Mask wearing & physical distancing interaction intensity               | Estimated: 20%-30%                                                                                                                                     | <ul style="list-style-type: none"> <li>• Halving the class size</li> <li>• Mask wearing enforced by teachers</li> </ul>                                                                                                                                                                                         | [3-8]   |
| Mask wearing, physical distancing, & ventilation interaction intensity | Estimated: 10%-20%                                                                                                                                     | <ul style="list-style-type: none"> <li>• Halving class size</li> <li>• Mask wearing enforced by teachers</li> <li>• Opening all windows, keeping doors open, and adding electric fans to increase air flow</li> </ul>                                                                                           | [3-10]  |

**Table 7. Mitigation strategies for Reopening Learning Centers Simulation Parameters**

The existing literature provides some guidance on the effects that specific interventions within the classroom may have on the evolution of COVID-19 within the settlement. We consider a baseline case in which learning centers are open with no interventions. Note, with respect to ventilation, options in schools vary with the type of classroom, e.g. some learning centers are built from bamboo allowing for more natural air to flow, while others appear to be smaller, concrete rooms [11, 12]. In enclosed settings, ventilation could consist of opening windows and doors as well as using electric fans to increase air flow. Finally, we note that since the classrooms are relatively small, with a suggested size of 40 square meters and a recommended class size of 35-40 students, effective social distancing is not possible without reducing the class size through alternating attendance or opening new classrooms [13].

| Intervention | Details<br>[Attendance, Extra<br>Learning Centers,<br>Learning Center<br>Intensity (%)] | Cumulative<br>Infections | Peak<br>Intensity | Peak<br>Timing |
|--------------|-----------------------------------------------------------------------------------------|--------------------------|-------------------|----------------|
| Baseline     | No Learning Centers                                                                     | 430621                   | 7846              | Day 94         |
| Baseline     | [Daily, 0, 100%]                                                                        | 522525                   | 17832             | Day 58         |
| 1            | [Alternating, 0, 100%]                                                                  | 496855                   | 13473             | Day 71         |
| 2            | [Daily, 10, 100%]                                                                       | 522525                   | 17832             | Day 58         |
| 3            | [Daily, 50, 100%]                                                                       | 523620                   | 18060             | Day 58         |
| 4            | [Daily, 100, 100%]                                                                      | 524145                   | 18542             | Day 56         |
| 5            | [Daily, 0, 20%]                                                                         | 453976                   | 9100              | Day 86         |
| 6            | [Daily, 0, 55%]                                                                         | 497084                   | 13678             | Day 67         |
| 7            | [Daily, 0, 90%]                                                                         | 520011                   | 17119             | Day 59         |

**Table 8. Learning Center Mitigations:** a summary of the learning center re-opening mitigation learning centers simulations. Intensity is compared to the baseline learning center intensity (55% that of the shelter intensity). Numbers are presented as 7-day rolling averages. Alternating daily attendance of learning centers and introducing a range of intensity reducing measures (such as those in Table 7) can significantly improve all metrics. Adding extra learning centers is not observed to make a noticeable difference. Note, that these data are for one simulation run only, however, the stochastic behaviour of the model is minimal.

## References

1. Toomey E, Conway Y, Burton C, Smith S, Smalle M, Chan XH, et al. Extended use or re-use of single-use surgical masks and filtering facepiece respirators: A rapid evidence review. medRxiv. 2020;.
2. Liang M, Gao L, Cheng C, Zhou Q, Uy JP, Heiner K, et al. Efficacy of face mask in preventing respiratory virus transmission: A systematic review and meta-analysis. *Travel medicine and infectious disease*. 2020;36:101751–101751.
3. Howard J, Huang A, Li Z, Tufekci Z, Zdimal V, van der Westhuizen HM, et al. Face masks against COVID-19: an evidence review. 2020;.
4. Fischer EP, Fischer MC, Grass D, Henrion I, Warren WS, Westman E. Low-cost measurement of face mask efficacy for filtering expelled droplets during speech. *Science Advances*. 2020;6(36):eabd3083.
5. Chu DK, Akl EA, Duda S, Solo K, Yaacoub S, Schünemann HJ, et al. Physical distancing, face masks, and eye protection to prevent person-to-person transmission of SARS-CoV-2 and COVID-19: a systematic review and meta-analysis. *The Lancet*. 2020;.
6. Wang Y, Tian H, Zhang L, Zhang M, Guo D, Wu W, et al. Reduction of secondary transmission of SARS-CoV-2 in households by face mask use, disinfection and social distancing: a cohort study in Beijing, China. *BMJ Global Health*. 2020;5(5):e002794.
7. Ahmed F, Zviedrite N, Uzicanin A. Effectiveness of workplace social distancing measures in reducing influenza transmission: a systematic review. *BMC public health*. 2018;18(1):518.
8. Feng Y, Marchal T, Sperry T, Yi H. Influence of wind and relative humidity on the social distancing effectiveness to prevent COVID-19 airborne transmission: A numerical study. *Journal of aerosol science*. 2020; p. 105585.
9. Atkinson J, Chartier Y, Pessoa-Silva CL, Jensen P, Li Y, Seto WH. Natural ventilation for infection control in health-care settings. *World Health Organization*; 2009.
10. Dai H, Zhao B. Association of infected probability of COVID-19 with ventilation rates in confined spaces: a Wells-Riley equation based investigation. medRxiv. 2020;.
11. Sector CE. Public Folder: BRAC, Two-Storey Learning Centers;. retrieved from, <https://drive.google.com/drive/folders/1WaIFGfe6k9jXz63QbAHx8jVRk9-2Ipw0>.
12. UK AI. Bangladesh: Estimated 500,000 Rohingya children being denied an education; 2019. retrieved from, <https://www.amnesty.org.uk/press-releases/bangladesh-estimated-500000-rohingya-children-being-denied-education>.
13. Sector CE. Guidance Note: Education Sector Standards for Rohingya Response;. retrieved from, [https://drive.google.com/drive/folders/1HqT3RmYUW8Z5B-q1gpqrY0o1SYaWJP\\_a](https://drive.google.com/drive/folders/1HqT3RmYUW8Z5B-q1gpqrY0o1SYaWJP_a).
